# Supplementary material
Source: PubMed Central journal article supplement (PMC4033376)
Supplement: ASN.2013080831_ASN2013080831SupplementaryData.pdf [file ASN.2013080831_ASN2013080831SupplementaryData.pdf]

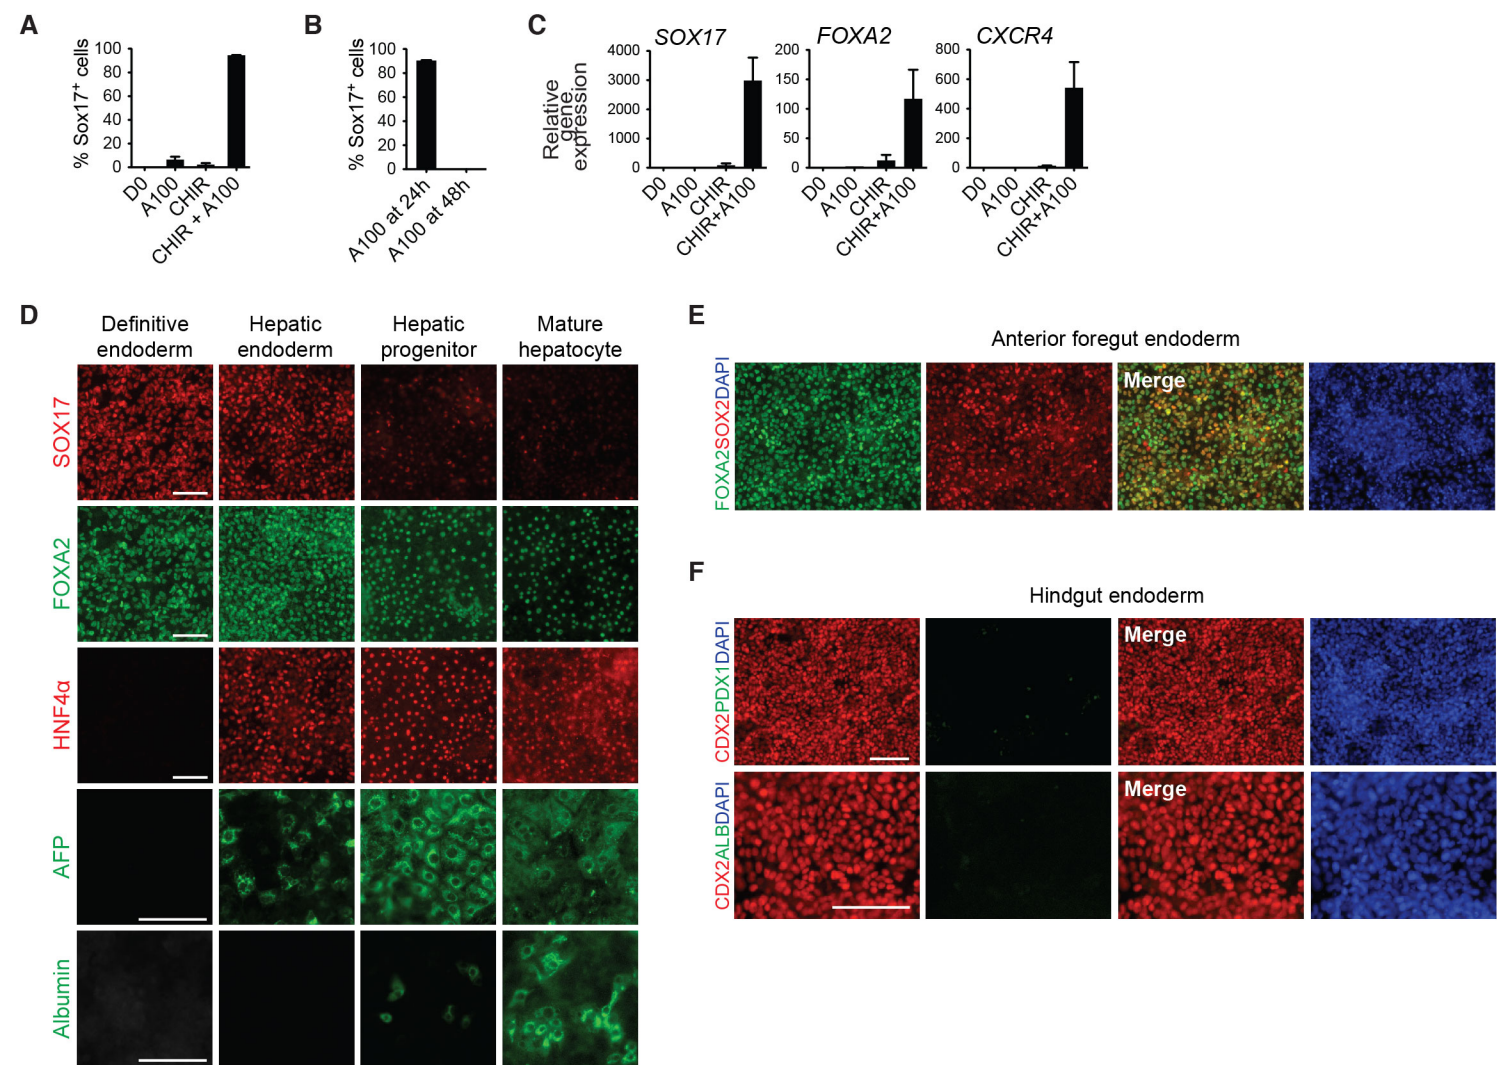

**Supplemental Figure 1.** Efficient differentiation of definitive endoderm and endodermal derivatives from CHIR-induced mesendodermal cells. (A) Quantification of SOX17<sup>+</sup> cells at day 4 of differentiation. Undifferentiated hPSCs (Day 0) serve as the negative control. (B) Quantification of SOX17<sup>+</sup> cells at day 4 of differentiation of hPSCs treated with activin A at either 24 or 48 hours after treatment with CHIR. (C) Quantitative RT-PCR of definitive endoderm genes in hPSCs treated with CHIR or CHIR + activin A. Gene expression normalized to Day 0. (D) hPSCs differentiated into definitive endoderm with CHIR + activin A were further differentiated into hepatocytes. Immunostaining for stage-specific markers at each step of differentiation is shown. (E) Cells at the definitive endoderm stage were differentiated with SB431542 and Noggin for 3 days into anterior foregut endoderm. (F) Cells at the definitive endoderm stage were further differentiated with FGF4 and CHIR for 4 days into hindgut endoderm expressing CDX2 without expression of foregut differentiation markers PDX1 or albumin. A100, activin A 100 ng/mL; ALB, albumin; C-PEP, pro-insulin C-peptide; INS, insulin; SS, somatostatin. Data represent means  $\pm$  s.e.m. (n = 3). Scale bar, 100  $\mu$ m.

## Supplemental Figure 2

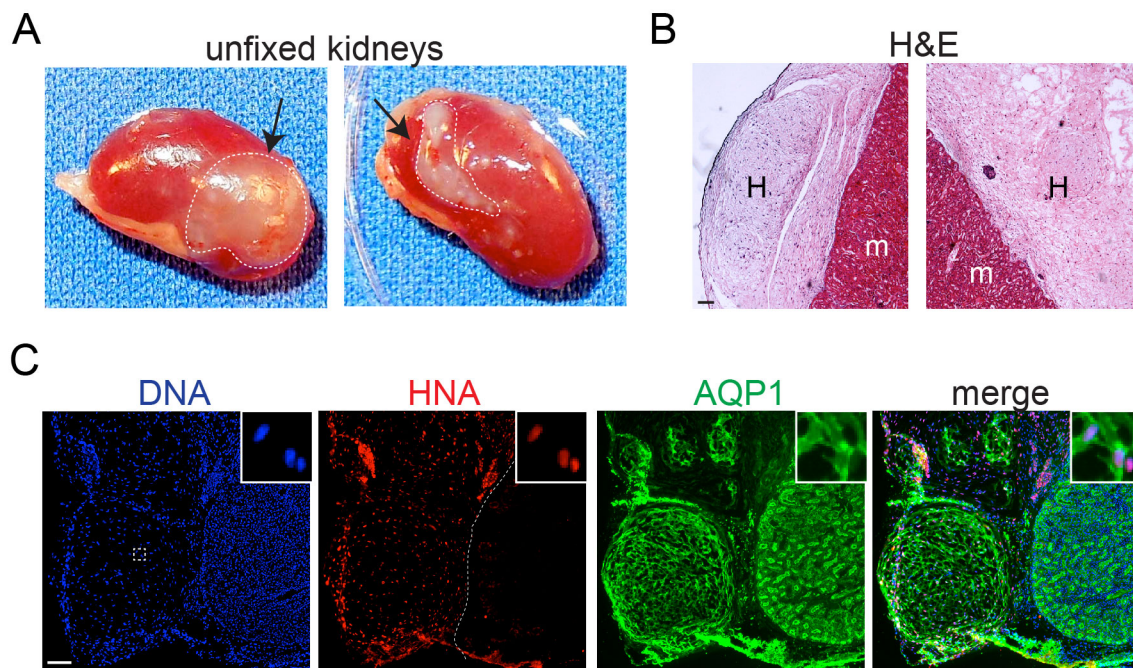

**Supplemental Figure 2. Growth of PSC-derived kidney progenitor cells *in vivo*.** (A) NOD-SCID mouse kidneys four weeks after subcapsular injection with human iPSC-derived tubule cultures. Macroscopic growths are indicated by arrows and surrounded by white dashed lines. (B) Hematoxylin and eosin (H&E) stained sections in these growths showing interface between mouse kidney (m) and human growth (H). (C) Colocalization of human nuclear antigen (HNA) with aquaporin-1 (AQP1). Insets show higher magnification of white boxed region (DNA panel). White dashed line in HNA panel indicates the boundary between human and mouse tissue.

**Supplemental Table 1: List of Primary Antibodies**

| <b>Antibody</b>                                 | <b>Source</b>                                       | <b>Dilution</b> |
|-------------------------------------------------|-----------------------------------------------------|-----------------|
| Acetylated Tubulin                              | Sigma                                               | 1:500           |
| AFP                                             | Dako                                                | 1:200           |
| Albumin                                         | Dako                                                | 1:200           |
| Aquaporin-1                                     | Millipore                                           | 1:100           |
| BRACHURY                                        | Santa Cruz                                          | 1:100           |
| CDX2                                            | Biogenex                                            | 1:100           |
| CK19                                            | Dako                                                | 1:50            |
| E-cadherin                                      | Abcam                                               | 1:1000          |
| FOXA2                                           | EMD Millipore                                       | 1:200           |
| FOXF1                                           | R&D                                                 | 1:500           |
| HNF4A                                           | Santa Cruz                                          | 1:100           |
| Human Nuclear Antigen                           | Millipore                                           | 1:250           |
| Insulin                                         | Dako                                                | 1:1000          |
| Kidney-specific protein                         | Gift from Dr. Hiroshi Itoh and Dr. Toshiaki Monkawa | 1:100           |
| Laminin                                         | Sigma                                               | 1:500           |
| LHX1                                            | Developmental Studies Hybridoma Bank                | 1:50            |
| Lotus Tetragonolobus Lectin (LTL), biotinylated | Vector Labs                                         | 1:200           |
| MIXL1                                           | Gift from Dr. Andrew Elefanty                       | 1:100           |
| N-cadherin                                      | Abcam                                               | 1:100           |
| OCT4                                            | Santa Cruz                                          | 1:100           |
| PAX2                                            | Covance                                             | 1:100           |
| PAX6                                            | Stemgent                                            | 1:100           |
| PDX1                                            | R&D                                                 | 1:100           |
| Pro-insulin C-peptide                           | EMD Millipore                                       | 1:500           |
| Polycystin-2                                    | Santa Cruz                                          | 1:100           |
| Somatostatin                                    | Dako                                                | 1:1000          |
| SALL1                                           | Cosmo Bio                                           | 1:200           |
| SIX2                                            | Abnova                                              | 1:200           |
| SIX2                                            | Proteintech                                         | 1:200           |
| SOX2                                            | Santa Cruz                                          | 1:100           |
| SOX17                                           | R&D                                                 | 1:100           |
| TBX6                                            | R&D                                                 | 1:100           |
| WT1                                             | Santa Cruz                                          | 1:50            |

**Supplemental Table 2: Primer Sequences**

| <b>Gene</b> | <b>Forward</b>       | <b>Reverse</b>       |
|-------------|----------------------|----------------------|
| AQP1        | ATTAACCCTGCTCGGTCCTT | ACCCTGGAGTTGATGTCGTC |
| AQP2        | ACGCCTTCACGTGTGTGTAT | TTGTTTTCTGCGCCGAAGTG |
| B-ACTIN     | CCAACCGCGAGAGAGTGA   | TCCATCACGATGCCAGTG   |
| BMP-4       | AAGCGTAGCCCTAAGCATCA | TGGTTGAGTTGAGGTGGTCA |

|              |                              |                             |
|--------------|------------------------------|-----------------------------|
| BRACHYURY    | GTGCTGTCCCAGGTGGCTTACAGATG   | CCTTAACAGCTCAACTCTAACTACTTG |
| CXCR4        | CACCGCATCTGGAGAACCA          | GCCCATTTCTCGGTGTAGTT        |
| EOMES        | ATCATTACGAAACAGGGCAGGC       | CGGGGTTGGTATTTGTGTAAGG      |
| EYA1         | TGCATATGGGCAAACACAGT         | CCAGGTTGAGGGGTTACTGAA       |
| EYA2         | CCGGTCTAAGAGGAGCAGTG         | CTGGTCACAATCCTCCAGGT        |
| FOXA2        | CCATTGCTGTTGTTGCAGGGAAGT     | CACCGTGTGAGGATTGGGAATGCT    |
| FOXF1        | CAGCCTCACATCACGCAAGG         | AGCCGAGCTGCAAGGCATC         |
| FOXI3        | CCACCCCTTGTCTCAACACT         | TTGCTCAGTTGCAAGGTGTC        |
| GSC          | GAGGAGAAAGTGGAGGTCTGGTT      | CTCTGATGAGGACCGCTTCTG       |
| KDR          | TTTTTGCCCTTGTCTGTCC          | TCATTGTTCCCAGCATTTC         |
| LHX1         | ATCCTGGACCGCTTTCTCTT         | GTACCGAAACACCGGAAGAA        |
| MEGALIN      | TGTGATGCAGCCATCGAACT         | TGCATTTGGGGAGGTCAGTC        |
| MEOX1        | AAAGTGTCCCCTGCATTCTG         | CACTCCAGGGTTCCACATCT        |
| MIXL1        | ACGTCTTTACAGCGCCGAACAG       | TTGGTTCGGGCAGGCAGTTCA       |
| NANOG        | TGCTTATTCAGGACAGCCCT         | TCTGGTCTTCTGTTTCTTGACT      |
| NEPHRIN      | GACCCAGCTTCCCATCACTA         | GCATTGGAGAGGAGCAGAAG        |
| OCT4         | CAGTGCCCGAAACCCACAC          | GGAGACCCAGCAGCCTCAA         |
| OSR1         | CCTTCCTTCAGGCAGTGAAC         | CGGCACTTTGGAGAAAGAAG        |
| OTX2         | GCAGAGGTCCTATCCCATGA         | CTGGGTGGAAAGAGAAGCTG        |
| PAX2         | CAAAGTTCAGCAGCCTTTCC         | CCACACCACTCTGGGAATCT        |
| PAX6         | ACCCATTATCCAGATGTGTTTGCCCGAG | ATGGTGAAGCTGGGCATAGGCGGCAG  |
| PAX8         | GCAACCATTCAACCTCCCTA         | CTGCTGCTGCTCTGTGAGTC        |
| SIX2         | CTGGAGAGCCACCAGTTCTC         | GCTGCGACTCTTTTCCTTGA        |
| SIX4         | CCCAAGATGGAGGGTCTGTA         | TGTGCTTCCATCTGAAGTGC        |
| SOX1         | CAATGCGGGGAGGAGAAGTC         | CTCTGGACCAAACGTGGCG         |
| SOX3         | AGACCAGGACCGTGTGAAAC         | GTCGATGAATGGTCGCTTCT        |
| SNAI1        | CCCACATCCTTCTCACTGC          | GTCAGCCTTTGTCCTGTAGC        |
| SOX17        | CGCACGGAATTTGAACAGTA         | GGATCAGGGACCTGTCACAC        |
| SYNAPTOPODIN | GCCGCAAATCCATGTTTACT         | CTCATCCGCTGTCTGTACCA        |
| TBX6         | AAGTACCAACCCCGCATACA         | TAGGCTGTCACGGAGATGAA        |
| UMOD         | AAACCCATGCCACTTACAGC         | CGGTCTTCAGGCTGACTTTC        |
| WT1          | GGGTACGAGAGCGATAACCA         | TCTCACCAGTGTGCTTCTG         |
